# Supplementary material for: Identifying occupational health hazards among healthcare providers and ancillary staff in Ghana: a scoping review protocol
Source: HighWire-hosted journal article supplement (doi:10.1136/bmjopen-2021-058048), 2022-01-01
Supplement: bmjopen-2021-058048supp001_data_supplement.pdf [file bmjopen-2021-058048supp001_data_supplement.pdf]

## Appendix I: Search strategy

Table 1: Final Search Strategy

| THEME        | NUMBER | SEARCH TERMS                                                                                                                                                                                                                                                                                                                                                                                                                                                                                                   |
|--------------|--------|----------------------------------------------------------------------------------------------------------------------------------------------------------------------------------------------------------------------------------------------------------------------------------------------------------------------------------------------------------------------------------------------------------------------------------------------------------------------------------------------------------------|
| Concept      | #1     | "Occupational Exposure" OR "occupational hazards" OR "occupational risks" OR "occupational diseases" OR "occupational injuries" OR "occupational accidents" OR "occupational stress" OR "sharp injuries" OR "needle pricks" OR "Cuts" OR "wounds" OR "airborne diseases" OR "infectious diseases" OR "physical abuse" OR "sexual abuse" OR "verbal abuse" OR "musculoskeletal injuries" OR "slips" OR "trips" OR "falls" OR "chemical spill" OR "fractures" OR "noise" OR "burns" OR "radiations" OR "burnout" |
| Participants | #2     | "Health Personnel" OR "health care workers" OR "health professionals" OR nurse* OR "healthcare workforce" OR "doctors" OR "laboratory workers" OR "midwives" OR "students" OR "kitchen staff" OR canteen workers OR "laundry workers" OR "Waste handlers" OR clean*                                                                                                                                                                                                                                            |
| Context      | #3     | "Ghana" OR Republic of Ghana OR Ghana*                                                                                                                                                                                                                                                                                                                                                                                                                                                                         |
| Search       | #4     | #1 AND #2 AND #3                                                                                                                                                                                                                                                                                                                                                                                                                                                                                               |
| Limitations  |        | <ol style="list-style-type: none"> <li>1. Language: Only studies published in English language will be included.</li> <li>2. Publication date: 1 January 2010 to 30 November 2021.</li> </ol>                                                                                                                                                                                                                                                                                                                  |
